# Supplementary material
Source: PubMed Central journal article supplement (PMC2719928)

## SUPPLEMENTARY FIGURE LEGENDS

### Supplementary Figure 1

**Presence of NK and T cells and expression of cytotoxic genes in livers of infants with biliary atresia.** Panel (A) depicts representative sections of livers from an unaffected control and from an infant at the time of diagnosis of biliary atresia immunostained with anti-CD56 antibody (to detect NK cells: red color, arrows) and anti-CD3 antibody (to detect T cells: green color, arrowheads) after nuclear counterstaining with DAPI (blue). Photograph represents an overlay of images captured with individual filters; white bar = 50  $\mu$ m. Panel (B) shows the hepatic mRNA expression for NK cell-enriched cytotoxic genes in livers of infants with biliary atresia. mRNA was quantified by real-time PCR and expressed as a ratio to human *HPRT* (mean  $\pm$  S.D.). N=9 for biliary atresia and N=7 for controls; \*P<0.05.

### Supplementary Figure 2

**Lysis of epithelial cells by RRV-primed NK cells.** Mean  $\pm$  S.D. of percent of  $^{51}\text{Cr}$  release by the cholangiocyte line mCL, hepatocyte line H2.35, lung epithelial line MLE-12, and breast carcinoma lines 4T1-MZ and 67-NR after 5 hours of co-culture with hepatic NK cells purified 7 days after injection of RRV into 1 day old mice. Ratios represent target (mCL, H2.35, MLE-12, 4T1-MZ, 67-NR) to effector (NK) cells. N=3 wells per group; results are representative of 2 independent experiments, with hepatic NK cells obtained from pools of 15-20 livers (\*P<0.01 when cytolytic activities are compared among the different ratios; \*\*P<0.01 when comparisons are from mCL or H2.35 to other cells).

### **Supplementary Figure 3**

**Expression of Nkg2d ligands.** Flow cytometry histogram of mCL cells labeled with anti-panRae1 antibodies or isotype control (**A**; number represents median fluorescence intensity of panRae1; representative figure of 3 different experiments). In panel **B**, the hepatic mRNA expression of the *Rae1* family of genes, *Mult1*, and *H60* after 7 days following saline or RRV injection is depicted as a ratio to *Gapdh*. \*P<0.02 for RRV versus saline groups; N=3-4 per group per time point.

### **Supplementary Figure 4**

**Number of hepatic NK cells and the expression of CD69 after RRV inoculation. (A)** Total number of hepatic CD49b+ cells based on flow cytometry 3-14 days after RRV injection in the first day of life with or without daily administration of blocking anti-Nkg2d antibodies. **(B)** Percentage of CD49b+ liver cells also expressing CD69. N=3-4 per group and per time point; \*P<0.05.

### **Supplementary Figure 5**

**Expression of cytokines and chemokines after RRV inoculation and anti-Nkg2d antibodies.** Hepatic mRNA expression for *Ifn $\gamma$* , *Cxcl9*, *Cxcl10*, *perforin* and *granzymes A and B* at 3-14 days after RRV injection to Balb/c mice in the first day of life and in a group of mice that also received daily administration of blocking anti-Nkg2d antibodies. The baseline level of mRNA expression is shown in saline-injected controls as interrupted black lines. N=3-4 per group and per time point; \*P<0.05.

### Supplementary Table 1

Average number of mononuclear cells per unit of gall bladder/extrahepatic bile duct harvested en bloc from neonatal mice at 7 and 14 days after saline or RRV inoculation in the first day of life. Cells were identified and quantified by flow cytometric analysis. N=15-20 for each group and time point.

|             | Day 7: saline | Day 7: RRV | Day 14: saline | Day 14: RRV |
|-------------|---------------|------------|----------------|-------------|
| CD3/CD4     | 1             | 24         | 1              | 7           |
| CD3/CD8     | 0             | 12         | 0              | 0           |
| CD19        | 7             | 0          | 0              | 0           |
| CD11b/Gr1   | 0             | 22         | 0              | 5           |
| CD11b/F4-80 | 2             | 104        | 1              | 5           |
| CD3/CD49b   | 1             | 20         | 0              | 1           |
| CD49b       | 71            | 1456       | 62             | 1019        |

CD19=B cells; CD11b/Gr1=neutrophils; CD11b/F4-80=macrophages; CD3/CD49b=NKT cells; CD49b=NK cells

## Supplementary Table 2

Oligonucleotide primer sequences and PCR product sizes used in real-time PCRs to quantify the expression of cytokines, chemokines, cytotoxic mediators, and NK cell-enriched genes.

| Gene                            | Primer Sequences                                                         | Temp. (°C) | Size (bp) |
|---------------------------------|--------------------------------------------------------------------------|------------|-----------|
| <i>Ifn<math>\gamma</math></i> * | For: 5'-GGCTGTCCCTGAAAGAAAGC-3'<br>Rev: 5'-GAGCGAGTTATTTGTCATTCGG-3'     | 52         | 100       |
| <i>Il12p40</i>                  | For: 5'-AAAGGCTGGGTATCGGTGG-3'<br>Rev: 5'-ACTGGCTGTGCTGGAACTCC-3'        | 52         | 118       |
| <i>Cxcl9</i>                    | For: 5'-GAGCTAGATAGACCTCACCAAG-3'<br>Rev: 5'-CCATTAGCACCATCTCTGA-3'      | 52         | 101       |
| <i>Cxcl10</i>                   | For: 5'-TCGCTCAAGTGGCTGGGATG-3'<br>Rev: 5'-TAGGGAGGACAAGGAGGGTGTG-3'     | 57         | 117       |
| <i>Perforin</i>                 | For: 5'-GGGTTTATCAGTTGTGCCGTC-3'<br>Rev: 5'-TAGCAGATGGACAGGGGTGTAG-3'    | 53         | 128       |
| <i>Granzyme-A</i>               | For: 5'-CTCACTCAATCAATAAGGAGCCAG-3'<br>Rev: 5'-CTGTTGCTTTTTTCTTTAGCCG-3' | 51         | 129       |
| <i>Granzyme-B</i>               | For: 5'-GGAACACCTCTTCTGCCACC-3'<br>Rev: 5'-AGCATTAGATAACATTCTCGGGG-3'    | 54         | 148       |
| <i>Rae1<math>\alpha</math></i>  | For: 5'-GCGAAGTGCTTAGTGGATGAAATAC-3'<br>Rev: 5'-GGTTGTGTCAAACATTCCCCC-3' | 53         | 122       |
| <i>Rae1<math>\beta</math></i>   | For: 5'-GAAGAAATGTTTGACACAACCTCTG-3'<br>Rev: 5'-CCTGGCTTTGCGGATAAATC-3'  | 52         | 137       |
| <i>Rae1<math>\gamma</math></i>  | For: 5'-CGATGATGGGGACCTTGTGC-3'<br>Rev: 5'-GGTGATACTGGGGGACCTTGAG-3'     | 52         | 124       |
| <i>Rae1<math>\delta</math></i>  | For: 5'-ACCATCAAGGCTCCTACCCC-3'                                          | 53         | 130       |

---

|                   |                                                                           |      |     |
|-------------------|---------------------------------------------------------------------------|------|-----|
|                   | Rev: 5'-CTTCAGTGGCATTGCTGTCTC-3'                                          |      |     |
| <i>Rae1ε</i>      | For: 5'-GAAAGATGATGGGGACCTTGTG -3'<br>Rev: 5'-TGATACTGGGGGACCTTGAGG -3'   | 52   | 125 |
| <i>H60</i>        | For: 5'-GTCACTGCCTCAACAAATCGTC-3'<br>Rev: 5'-GTCGGAAGTTATTCAGTGTAGGATG-3' | 52   | 123 |
| <i>Mult1</i>      | For: 5'-TCCTCTTGCTCTGTTCTTTCC-3'<br>Rev: 5'-TGCTGCTTGTAATAATGGAGTCAC-3'   | 52   | 136 |
| <i>Gapdh</i>      | For: 5'-TGGTTTGACAATGAATACGGCTAC-3'<br>Rev: 5'-GGTGGGTGGTCCAAGGTTTC-3'    | 52   | 92  |
| <i>CD69**</i>     | For: 5'-GACTTCAGCCCAAATGCTTG-3'<br>Rev: 5'-TCCAACCCAGTGTTCTCTCTAC-3'      | 51.6 | 115 |
| <i>CRTAM</i>      | For: 5'-GCAACTCCTTTCAAGCCAATCC-3'<br>Rev: 5'-CAAGTAGCCAGGTTATCTGCGG-3'    | 53.5 | 124 |
| <i>SLAM</i>       | For: 5'-TATGCCCCATTCTGGAGAG-3'<br>Rev: 5'-CACAGTGGAGTAAACCGTATTTGC-3'     | 51.3 | 101 |
| <i>GRANZYME-A</i> | For: 5'-ATGGTTTGTGCTGGAAGCCTCC-3'<br>Rev: 5'-GGGTCTCCGCATTTATTTCAAGG-3'   | 56.0 | 128 |
| <i>GRANZYME-B</i> | For: 5'-ACCATTGAGTTGTGCGTGGG-3'<br>Rev: 5'-GCCATTGTTTCGTCCATAGGAG-3'      | 54.7 | 123 |
| <i>NKG7</i>       | For: 5'-ATTTCTGGTTTGAGGCTGTGG-3'<br>Rev: 5'-CATAATGCTGAAGGTCTGCGTC-3'     | 55.0 | 116 |
| <i>FCGR3B</i>     | For: 5'-CTGACTTCCACATTCCAAAAGC-3'<br>Rev: 5'-TGCCAAACCTTGAGTGATGG-3'      | 52.7 | 122 |
| <i>KLRC2</i>      | For: 5'-ACTGCCACCTCCAGAGAAGC-3'<br>Rev: 5'-TGCTCCAGGAAAGGAATAAGAAC-3'     | 51.9 | 105 |
| <i>KLRC4</i>      | For: 5'-CAAAGAGGCAGCAAAGGAAAC-3'<br>Rev: 5'-CATTCCCTTGATGATCCGAAG-3'      | 49.8 | 117 |
| <i>ULBP1</i>      | For: 5'-ATGTACTGGGAACAAATGCT-3'                                           | 53.0 | 127 |

---

---

|              |                                                                          |      |     |
|--------------|--------------------------------------------------------------------------|------|-----|
|              | Rev: 5'-GAATGAAGCAGAGGAAGATG-3'                                          |      |     |
| <i>ULBP2</i> | For: 5'-ATCATGGACCCAATAGCTC-3'<br>Rev: 5'-ATCAGGTAGCACCAAGAGAA-3'        | 47.3 | 105 |
| <i>ULBP3</i> | For: 5'-AGGTCAGGATGTCTTGTGAG-3'<br>Rev: 5'-TGTCCACTTTCTGTTGTTTG-3'       | 50.5 | 113 |
| <i>KLRF1</i> | For: 5'-GGATTGGGCTTAACTTTACCTCC-3'<br>Rev: 5'-TGCTTTCCTTAATGGCAGCAC-3'   | 51.4 | 129 |
| <i>MIC-B</i> | For: 5'-TCAAGGACCAGAAAGGAGGC-3'<br>Rev: 5'-AGGTTTTGGGAGAGGAAGAGC-3'      | 54.6 | 127 |
| <i>NCR1</i>  | For: 5'-CAGAAATGTATGACACACCCACC-3'<br>Rev: 5'-TTCCCTCCTTGAGCAGTAAGAAC-3' | 54.1 | 126 |
| <i>NCR2</i>  | For: 5'-TGTGTTCTGTGGACTCCTCGTAG-3'<br>Rev: 5'-TGGCAGGTGGCTTTTTGG-3'      | 55.9 | 126 |
| <i>NCR3</i>  | For: 5'-TGGTGGTGGAGAAAGAACATCC-3'<br>Rev: 5'-CATTTGCCCTGGTAATAGACGG-3'   | 55.7 | 124 |
| <i>HPRT</i>  | For: 5'-CCAGTCAACAGGGGACATAAAAG-3'<br>Rev: 5'-GACCAAGGAAAGCAAAGTCTGC-3'  | 50.9 | 127 |

---

Temp: annealing temperature

Size (bp): product size in base pairs

\*Non-capital letters denote murine genes

\*\*Capital letters denote human genes

Suppl. Figure 1

**A**

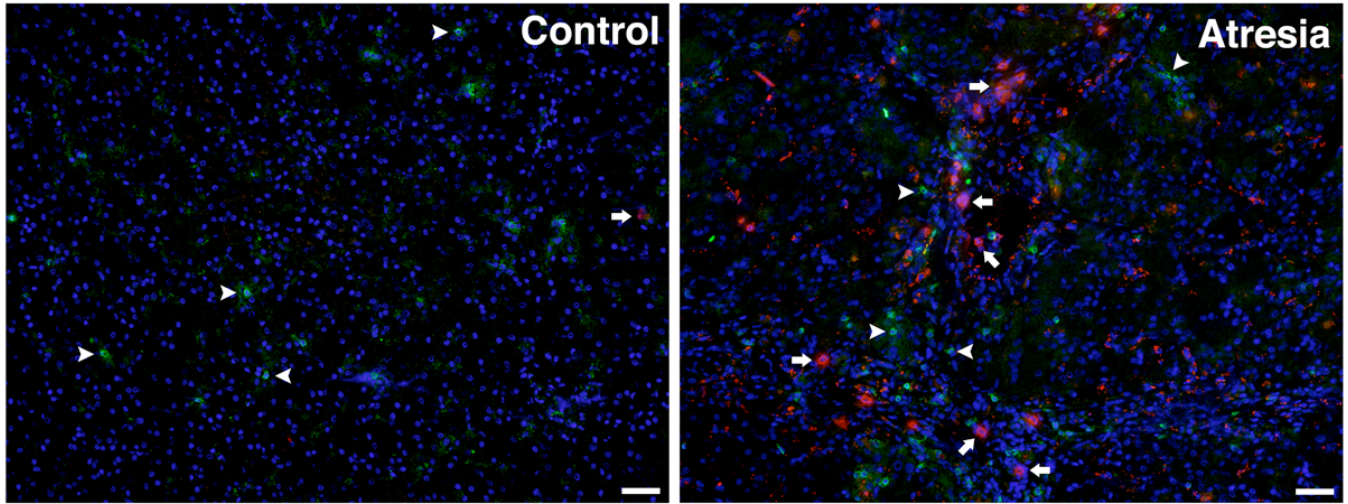

**B**

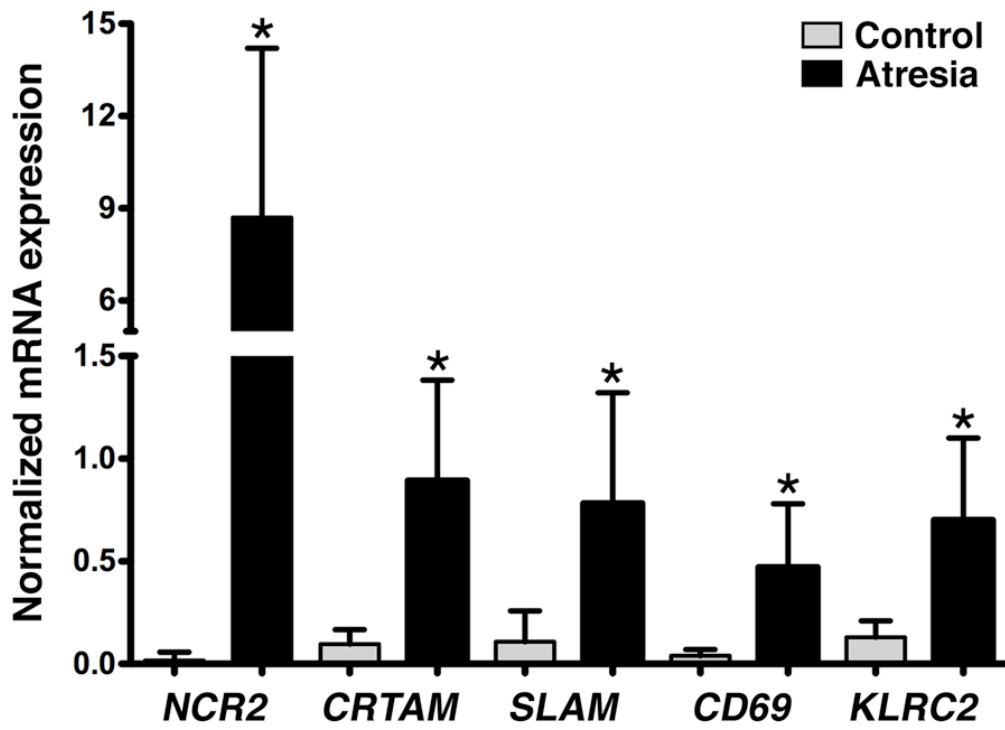

Suppl. Figure 2

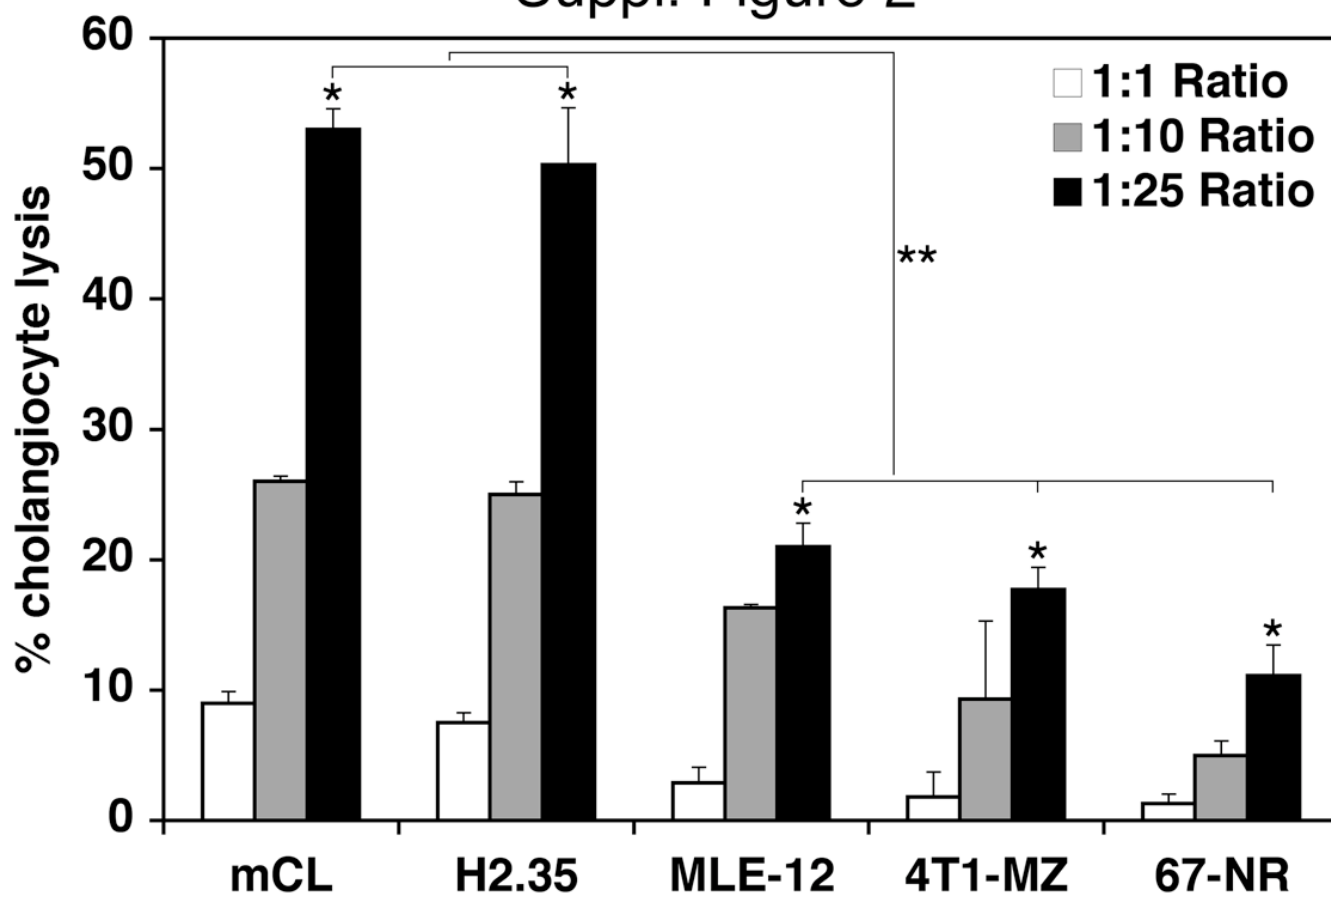



Suppl. Figure 3

**A**

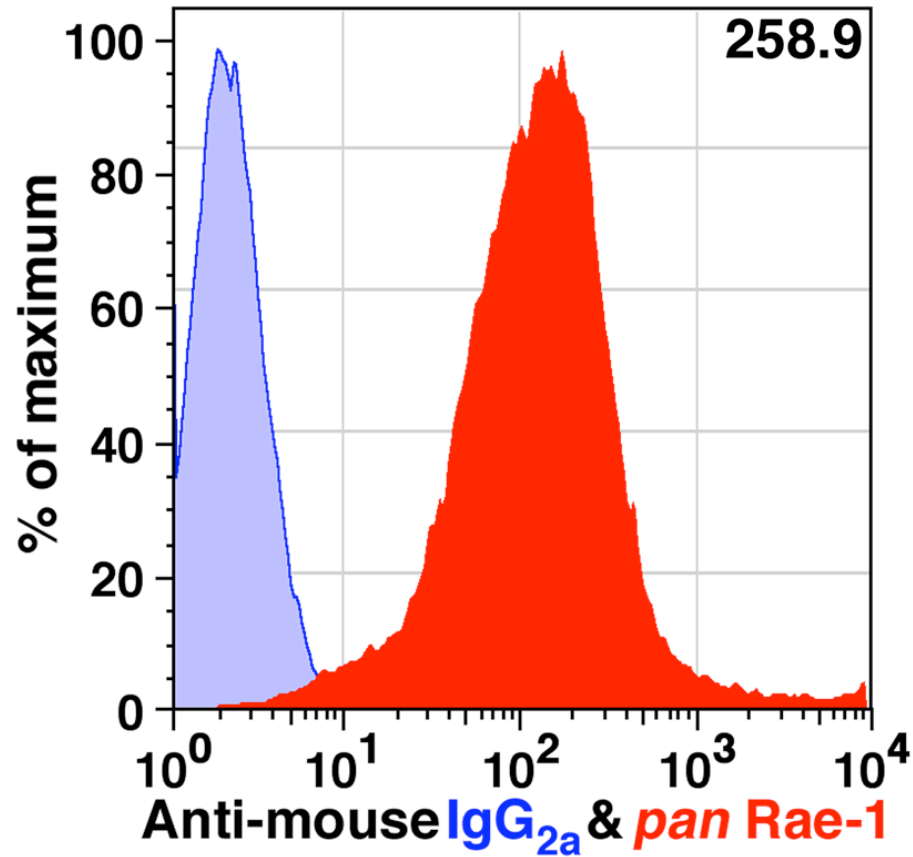

**B**

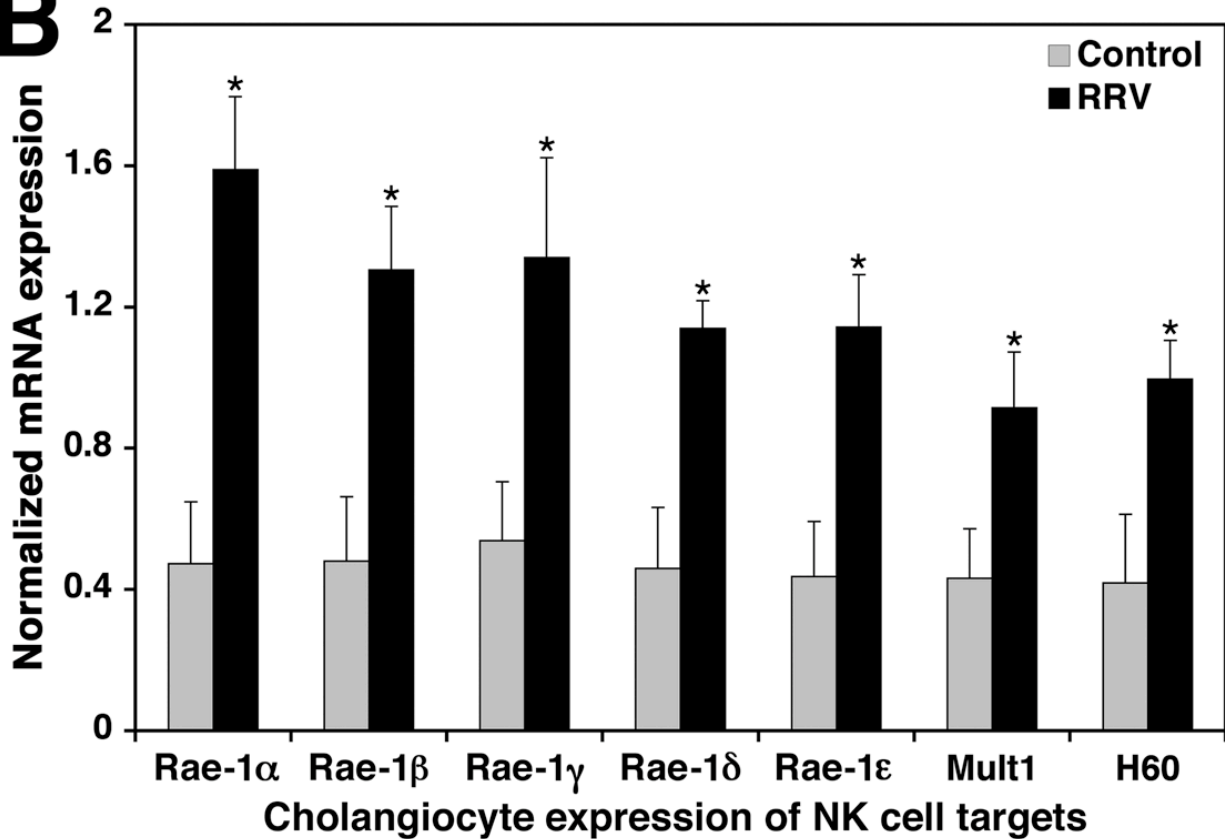

# Suppl. Figure 4

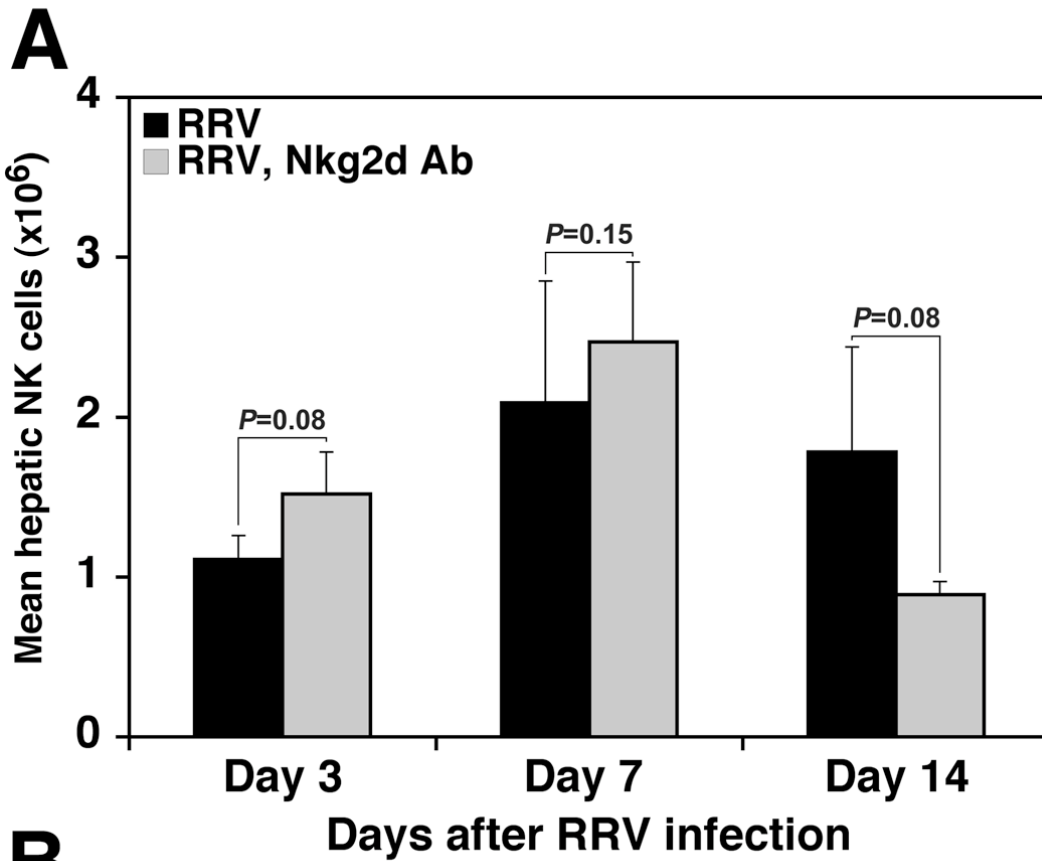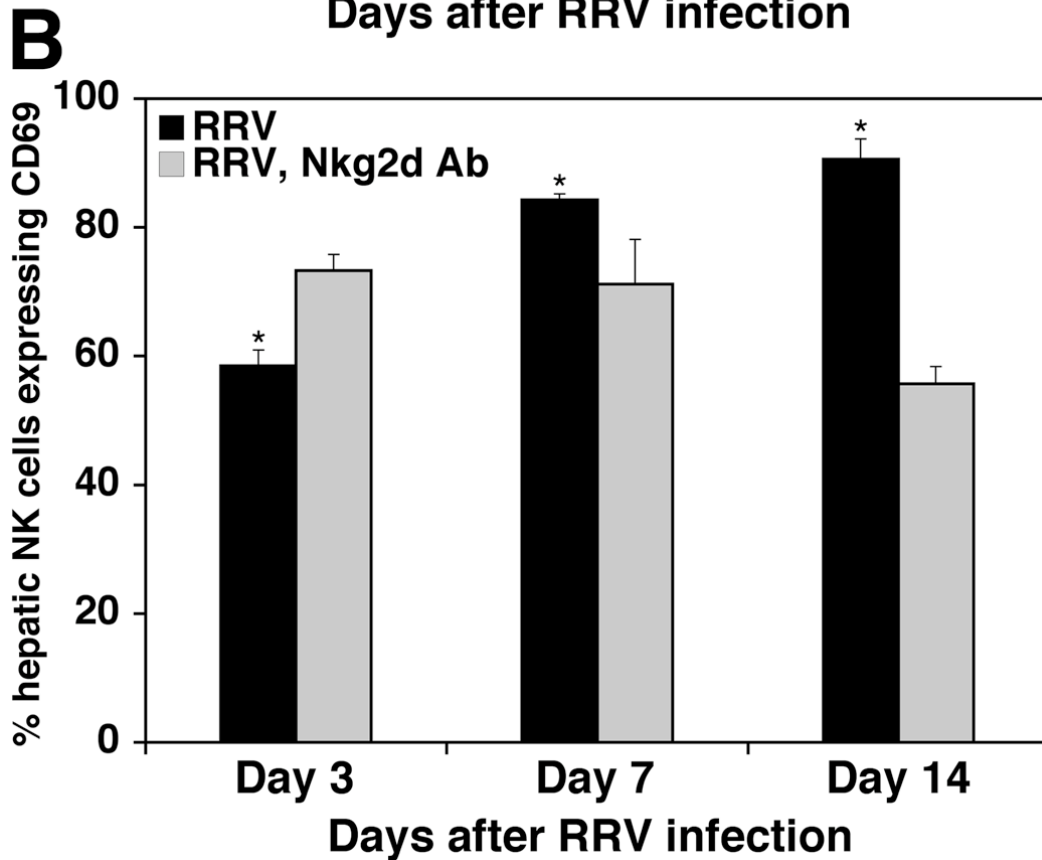

# Suppl. Figure 5

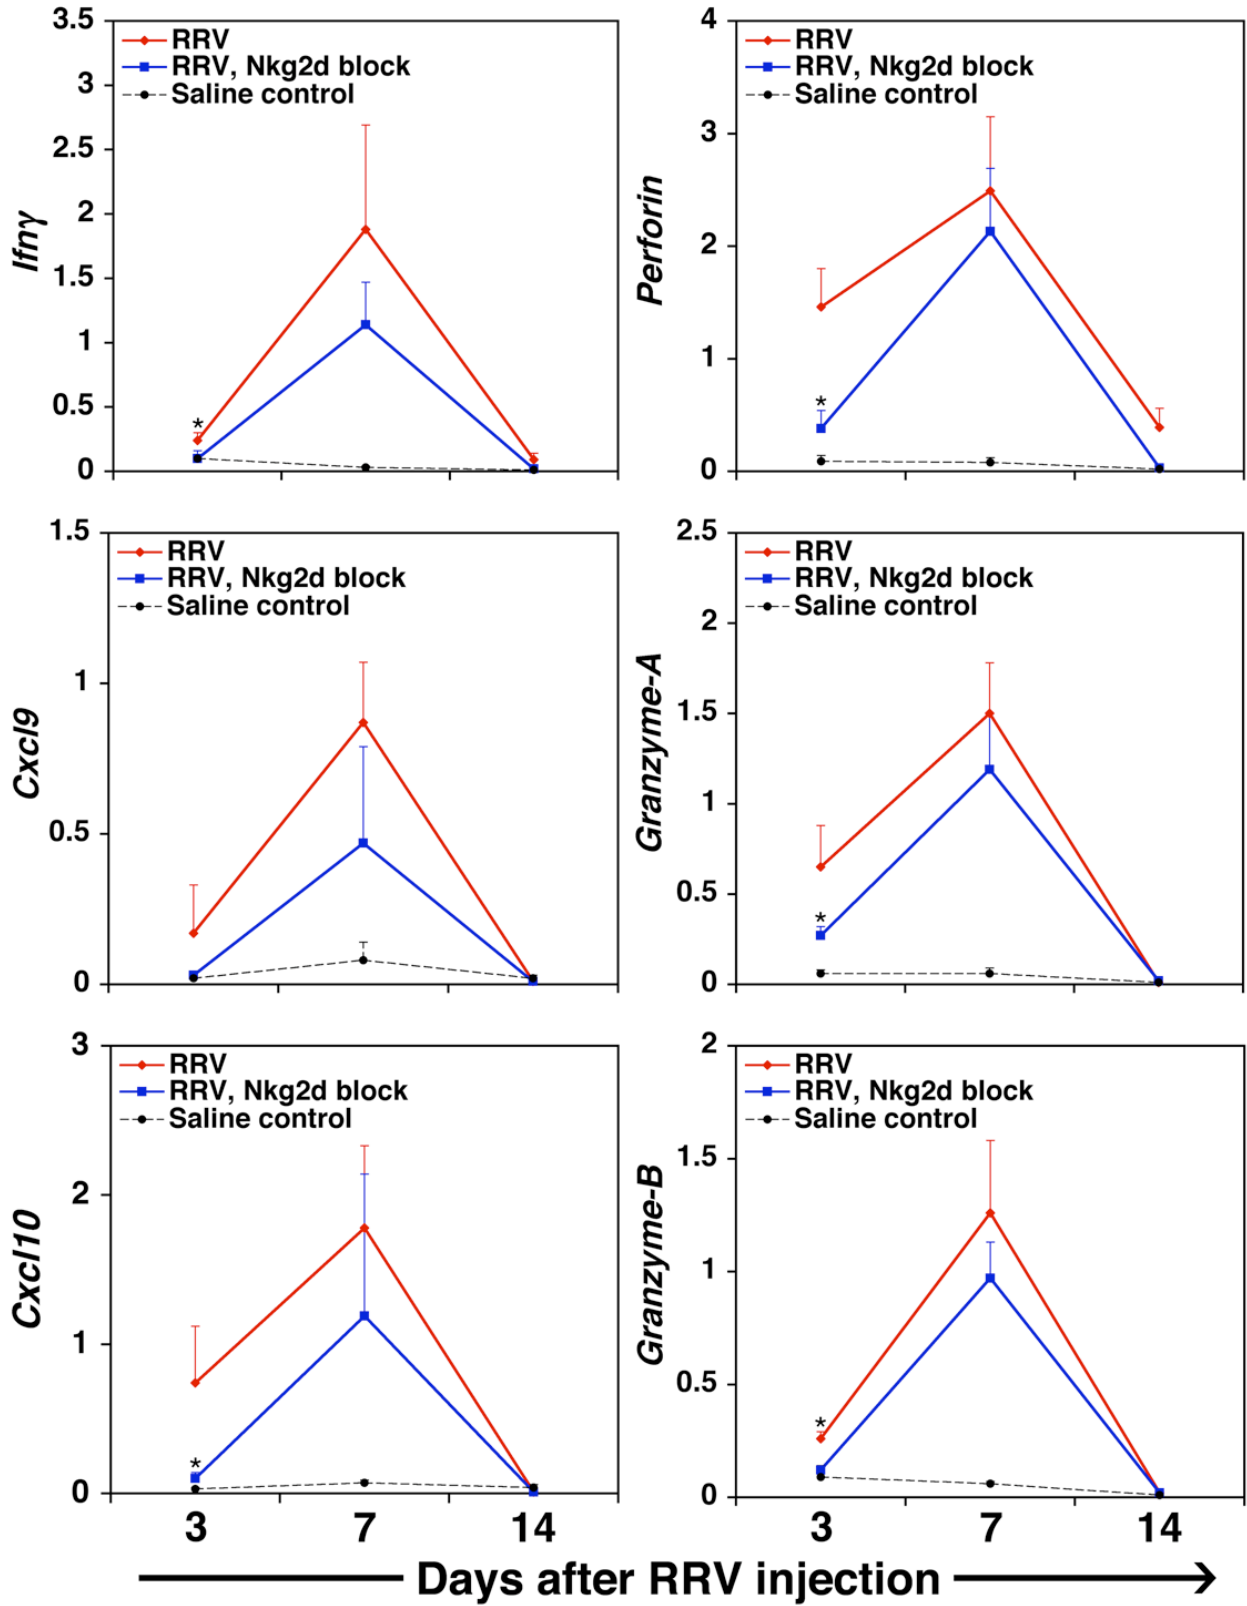

Supplement: JCI38879sd.pdf [file JCI38879sd.pdf]
